# Supplementary material for: circEPSTI1 as a Prognostic Marker and Mediator of Triple-Negative Breast Cancer Progression
Source: PubMed Central journal article supplement — Theranostics. 2018 Jul 1;8(14):4003–15. doi: 10.7150/thno.24106 (PMC6071524; doi:10.7150/thno.24106), 2018-07-01
Supplement: thnov08p4003s1.pdf [file thnov08p4003s1.pdf]

## Supplementary Figures

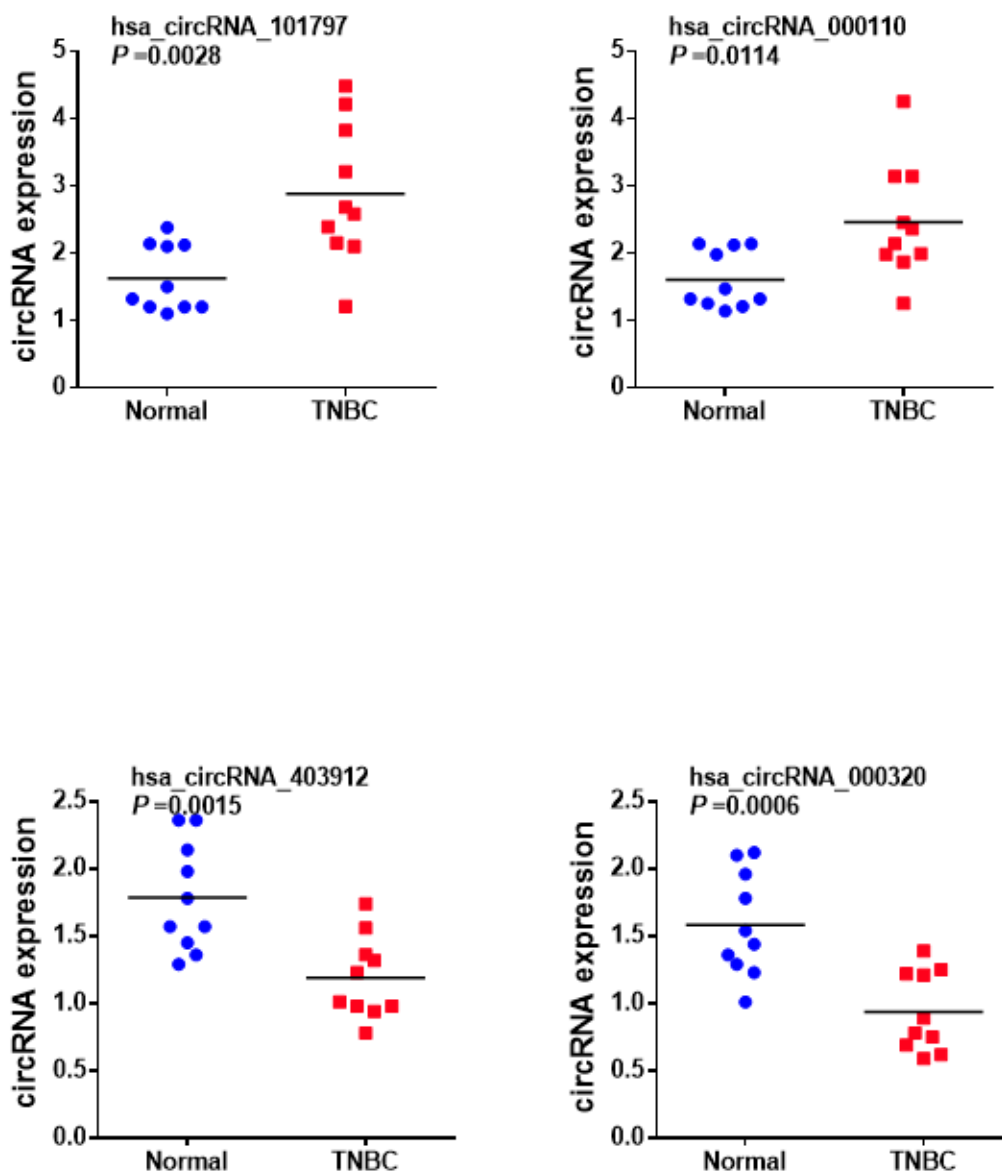

Supplementary Fig. S1 Validation of 4 differentially expressed circRNA candidates in 10 paired TNBC tissues and matched normal tissues by qRT-PCR.

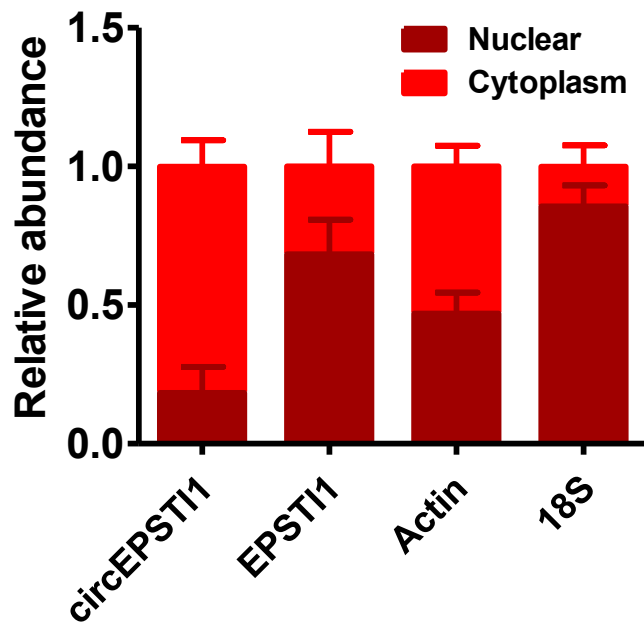

Supplementary Fig. S2. qRT-PCR analysis of circEPSTI1 and EPSTI1 RNA in either the cytoplasm or the nucleus in MDA-MB-231 cells.

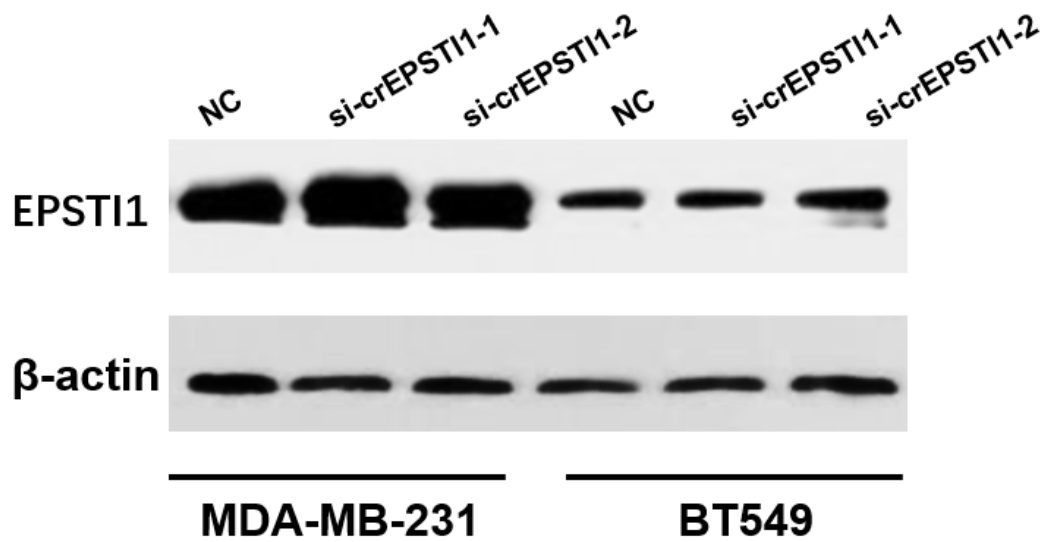

Supplementary Fig. S3. Western blots analysis of EPSTI1 protein levels after treatment with two siRNAs of circEPSTI1 in both MDA-MB-231 and BT549.

**A**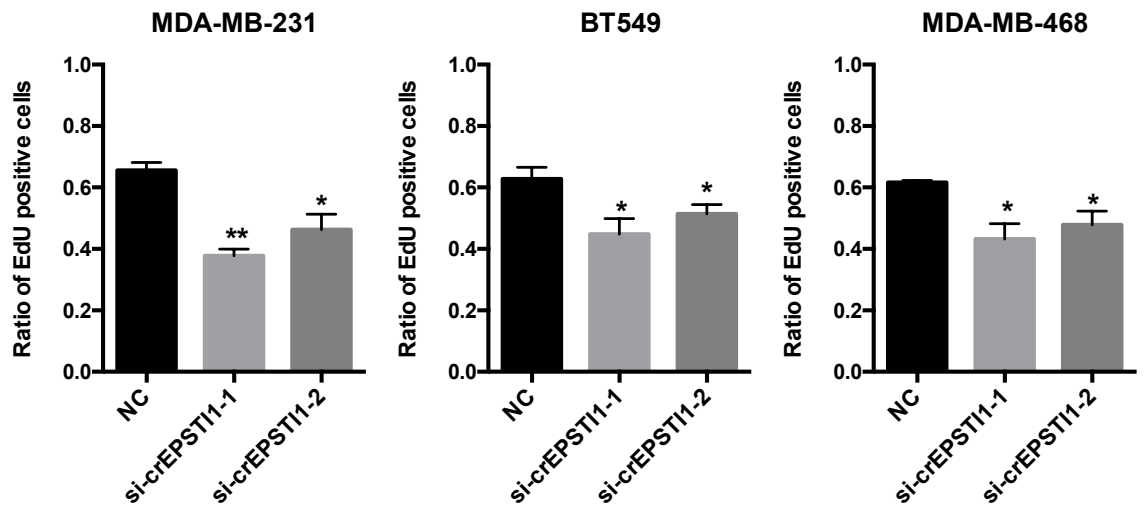**B**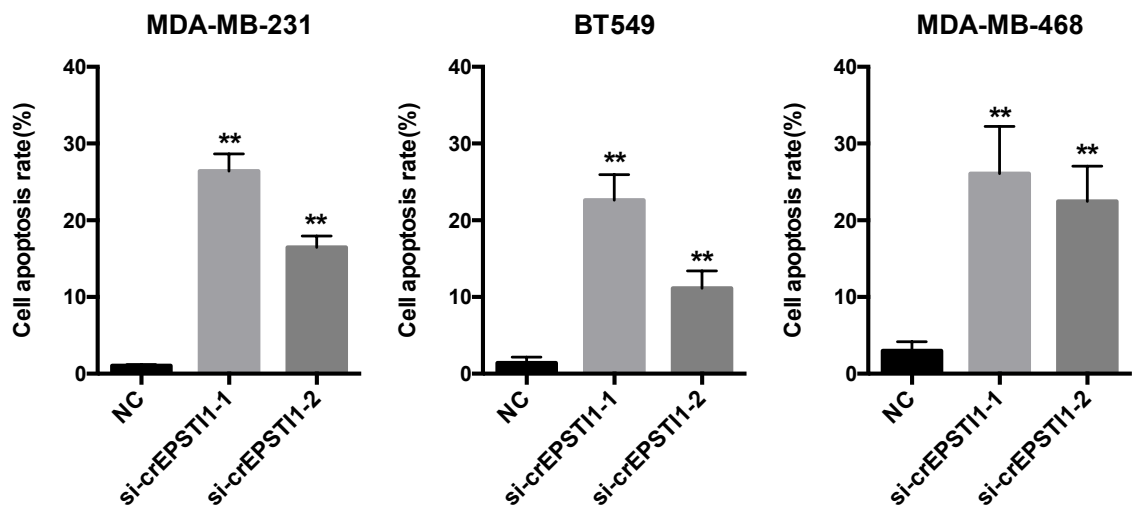

Supplementary Fig. S4. (A) EdU assay and (B) apoptosis assay in MDA-MB-231, BT549 and MDA-MB-468 cells transfected with control or circEPST11 siRNAs. \*P < 0.05; \*\*P < 0.01

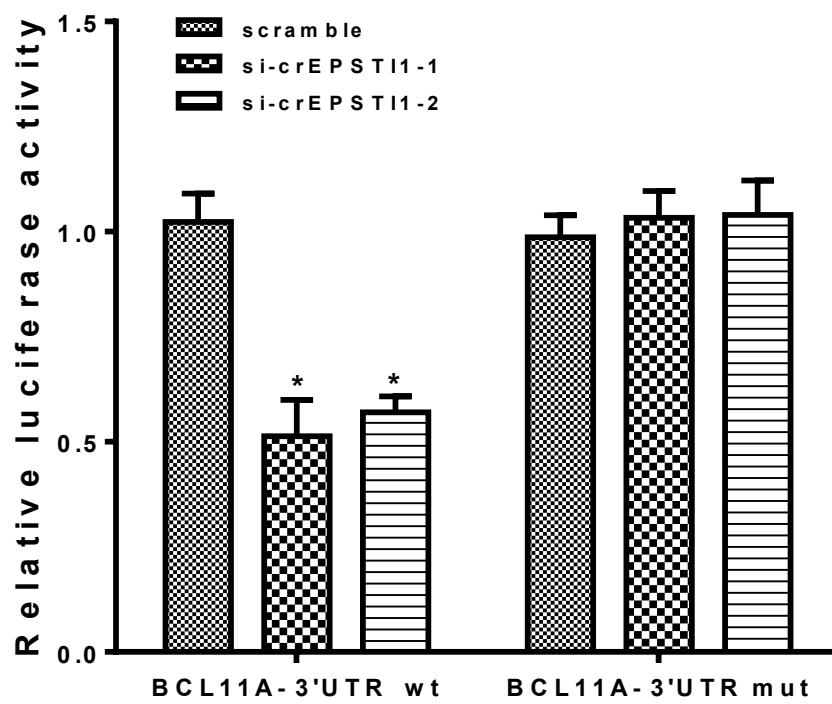

Supplementary Fig. S5. Luciferase assay of si-circEPSTI1 effects on BCL11A-3'UTR.

**Supplementary Table S1. Primers and RNA sequences used in this study**

| List of oligonucleotide sequences         | 5'→ 3'                        |
|-------------------------------------------|-------------------------------|
| <b>primers for qRT-PCR</b>                |                               |
| circEPSTII-qF                             | AAGCTGAAGAAGCTGAACTC          |
| circEPSTII-qR                             | GTGTATGCACTTGTGTATTGC         |
| EPSTII-qF                                 | GACAGAAGTGCCTGTCAAAGTG        |
| EPSTII-qR                                 | GCCGTTTCAGTTCAGTAATTC         |
| β-actin -qF                               | CATGTACGTTGCTATCCAGGC         |
| β-actin -qR                               | CTCCTTAATGTCACGCACGAT         |
| 18S-qF                                    | TTAATTCCGATAACGAACGAGA        |
| 18S-qR                                    | CGCTGAGCCAGTCAGTGTAG          |
| BCL11A-qF                                 | TGGTATCCCTTCAGGACTAGGT        |
| BCL11A-qR                                 | TCCAAGTGATGTCTCGGTGGT         |
| <b>siRNAs</b>                             |                               |
| si-crEPSTII-1                             | GCAAUACACAAGUGCAUACTT         |
| si-crEPSTII-2                             | AGCAAUACACAAGUGCAUATT         |
| Negative control                          | UUCUCCGAACGUGUCACGUTT         |
| <b>Oligos for plasmid construction</b>    |                               |
| LUC-UTR <sub>circ</sub> EPSTII-F          | gcagaattCTAGGTGGAAGCCAGTCAGA  |
| LUC-UTR <sub>circ</sub> EPSTII-R          | gcaggatcGTGTATGCACTTGTGTATTGC |
| <b>primers for site-directed mutation</b> |                               |
| LUC-UTR <sub>circ</sub> EPSTII-Mut1-F     | :                             |
| AGCTAAAATCTCTAGAATCTGTAAGAATCAAGAAGGAAGCT |                               |
| LUC-UTR <sub>circ</sub> EPSTII-Mut1-R     | :                             |
| CAGATTCTAGAGATTTTAGCTTTTGCTTGTATTTAGATTGC |                               |
| LUC-UTR <sub>circ</sub> EPSTII-Mut2-F     | :                             |
| ATTCAGAGTCTCTAGAGCAATAAACTGGAGGAGAAAAAAG  |                               |
| LUC-UTR <sub>circ</sub> EPSTII-Mut2-R     | :                             |
| ATTGCTCTAGAGACTCTGAATTGCCTTCATTTTTTGGAGTT |                               |
| LUC-UTR <sub>circ</sub> EPSTII-Mut3-F     | :                             |
| AACCTTAGAATTCTCGCATTTAGAGAGCATCAGCAATACAC |                               |
| LUC-UTR <sub>circ</sub> EPSTII-Mut3-R     | :                             |
| TAAATGCGAGAATTCTAAGGTTTTCTTGAAGTCTTTTTTTC |                               |

**Supplementary Table S2. The top ten up-regulated and down-regulated circRNAs in TNBC**

| circRNA            | chrom | circRNA_type      | Fold Change (abs) | Regulation |
|--------------------|-------|-------------------|-------------------|------------|
| hsa_circRNA_000479 | chr13 | exonic            | 7.6281409         | Up         |
| hsa_circRNA_101797 | chr16 | exonic            | 4.8781993         | Up         |
| hsa_circRNA_000432 | chr12 | exonic            | 4.3371933         | Up         |
| hsa_circRNA_100012 | chr1  | exonic            | 4.2774198         | Up         |
| hsa_circRNA_000110 | chr1  | exonic            | 3.8854213         | Up         |
| hsa_circRNA_069718 | chr4  | exonic            | 3.7157459         | Up         |
| hsa_circRNA_103637 | chr4  | exonic            | 3.688537          | Up         |
| hsa_circRNA_038632 | chr16 | exonic            | 3.686909          | Up         |
| hsa_circRNA_002172 | chr14 | sense overlapping | 3.6770438         | Up         |
| hsa_circRNA_013055 | chr1  | exonic            | 3.4792793         | Up         |
| hsa_circRNA_101093 | chr12 | exonic            | 7.2128671         | Down       |
| hsa_circRNA_000320 | chr11 | intronic          | 4.5055624         | Down       |
| hsa_circRNA_000319 | chr11 | intronic          | 4.186804          | Down       |
| hsa_circRNA_403912 | chr7  | exonic            | 3.4829476         | Down       |
| hsa_circRNA_001596 | chr6  | sense overlapping | 3.275472          | Down       |
| hsa_circRNA_100460 | chr1  | exonic            | 3.1615607         | Down       |
| hsa_circRNA_100446 | chr1  | exonic            | 3.1451731         | Down       |
| hsa_circRNA_012722 | chr1  | exonic            | 3.0409123         | Down       |
| hsa_circRNA_104671 | chr8  | exonic            | 2.9987161         | Down       |
| hsa_circRNA_100499 | chr1  | exonic            | 2.8737785         | Down       |

**Supplementary Table S3. The information of TNBC patients in circular RNA microarray assays**

|                                 | TNBC case 1 | TNBC case 2 | TNBC case 3 |
|---------------------------------|-------------|-------------|-------------|
| Sex                             | Female      | Female      | Female      |
| Age (years)                     | 43          | 60          | 29          |
| Tumor size (cm)                 | 2.3         | 2.6         | 4.5         |
| Number of lymph node metastasis | 1           | 2           | 3           |
| TNM Staging                     | II          | II          | II          |
| Histological grade              | G3          | G3          | G2          |
| Ki-67                           | 60%+        | 40%+        | 20%+        |
